# Supplementary material for: The first tridentate phosphine ligand combining planar, phosphorus and carbon chiralityElectronic supplementary information (ESI) available: experimental section. See http://www.rsc.org/suppdata/cc/b2/b208384a/
Source: Royal Society of Chemistry journal article supplement (doi:10.1039/b208384a), 2002-10-16
Supplement: b208384a.doc [file b208384a.doc]

**Supplementary** **data**

**The first tridentate phosphine ligand combining planar, phosphorus and carbon chirality**

Pierluigi Barbaro,**a* Claudio Bianchini,*a* Giuliano Giambastiani**a* and Antonio Togni*b*

a Istituto di Chimica dei Composti Organo Metallici - CNR, Via Jacopo Nardi 39, 50132 Firenze, Italy. Fax: +39 055 2478366

*b Department of Chemistry, Swiss Federal Institute of Technology, ETH Hönggerberg, CH-8093 Zürich, Switzerland*

**Experimental Section**

**General Information.** All manipulations were performed under a pure nitrogen atmosphere unless otherwise stated. Diethyl ether, C6H6 and THF were distilled over Na - benzophenone. CH3CN was dried over CaH2. Toluene, *n*-pentane and *n*-hexane were distilled over sodium. CeCl3 was dried at 140 °C for 8 h under vacuum prior of use. (*R*)-(*S*)-PPFA was prepared from (*R*)-*N*,*N*-dimethyl-ferrocenylethylamine as previously described.1 Diphenylvinylphosphine and diphenylvinylphosphineoxide were prepared slightly modifying a reported procedure.2 [Ni(CH3CN)6](BF4)2.0.5CH3CNwas synthethized as previously described and was recrystallized twice from CH3CN/diethyl ether prior to use.3 *Rac*-C6H5P(H)CH2CH2P(O)(C6H5)2 was obtained from diphenylvinylphosphineoxide in 60% yield, using the same procedure previously described for the synthesis of the parent sulfide compound C6H5P(H)CH2CH2P(S)(C6H5)2.4 All the other chemicals were commercial products and were used as received without further purification. The solid compounds were collected on sintered glass frits before being dried in a stream of nitrogen.

31P{1H} NMR spectra were recorded on either a Bruker 200-ACP spectrometer operating at 81.01 MHz or a Bruker Avance DRX-400 spectrometer operating at 161.98 MHz. Chemical shifts are relative to external 85% H3PO4 with downfield values reported as positive. 1H and 13C{1H} NMR spectra were recorded at 200.13 and 50.32 MHz, respectively, on a Bruker 200-ACP spectrometer or at 400.13 and 100.61 MHz, respectively, on a Bruker Avance DRX-500 spectrometer. The spectrometers were equipped with a variable temperature control unit accurate to  0.1 C. Chemical shifts are relative to tetramethylsilane as external reference or calibrated against solvent resonances. The assignements of the signals resulted from 1D spectra, 1H{31P} heteronuclear decoupling experiments, 1H COSY and proton detected 1H,13C and 1H,31P correlations using degassed nonspinning samples. 2D NMR spectra were recorded using pulse sequences suitable for phase-sensitive representations using TPPI. The 1H,13C and 1H,31P correlations5 were recorded using the standard HMQC sequence with decoupling during acquisition.

Infrared spectra were recorded on a Perkin-Elmer 1600 Series FT-IR spectrometer using samples mulled in Nujol between KBr plates. Merck silica gel 60, 230-400 mesh ASTM was used for column chromatography. Thin-layer chromatography was performed with Macherey-Nagel Polygram SIL G/UV254 precoated plastic sheets. Optical rotations were measured with a Perkin-Elmer 341 polarimeter using 10 cm cells.

**Synthesis of the Compounds. P3ChirO Diastereomers (1).** Solid *rac*-C6H5P(H)CH2CH2P(O)(C6H5)2 (0.61 g, 1.79 mmol) was added to a solution of (*R*)-(*S*)-PPFA(0.72 g, 1.63 mmol) in acetic acid (8 mL) and the mixture was stirred at 75 °C for 17 hours. After that time, the solvent was removed at 75 °C in vacuo and the residue obtained was dissolved in CH2Cl2, washed with acqueous K2CO3 and dried over sodium sulfate. The solvent was evaporated to dryness to give an organge solid which was purified by flash chromatography (silica, *n-*pentane : acetone = 3:1). Yield 84 %. 31P{1H} NMR analysis (CDCl3, 81.01 MHz, 294 K) showed the compound to be a 1:1 mixture of (*R*)C-(*S*)Fe-(*R*)P and (*R*)C-(*S*)Fe-(*S*)P diastereomers (see Table 1). 1H NMR (CDCl3, 200.13 MHz, 294 K): 4.38 (*m*, 3H, C5H3), 4.17 (*m*, 2H, C5H3), 4.08 (*m*, 1H, C5H3), 3.96 (*s*, 5H, C5H5), 3.92 (*s*, 5H, C5H5), 3.41 (*m*, 1H, C*H*CH3), 3.23 (*qd*, 1H, C*H*CH3, 3*J*HH = 7.3, 2*J*HP = 3.8 Hz), 2.35 - 2.42 (*m*, 2H, PCH2), 1.65 - 2.21 (*m*, 6H, PCH2), 1.32 (*dd*, 3H, CHC*H*3,3*J*HH = 6.6, 3*J*HP = 12.1 Hz), 1.28 (*dd*, 3H, CHC*H*3,3*J*HH = 7.3, 3*J*HP = 13.3 Hz). Anal. Calcd for C44H41FeOP3: C, 71.94; H, 5.63. Found: C, 71.92; H, 5.65.

**P3ChirO·2(BH3) Diastereomers (2).** A solution of BH3·(CH3)2S (2 M in diethyl ether, 15.5 mL, 30.9 mmol) was slowly added at 0 °C to a solution of the 1:1 diastereomeric mixture **1** (9.08 g, 12.4 mmol) in THF (200 mL). After stirring at r.t. for 30 min., the solvent was evaporated to dryness under HV to give **2** in a quantitative yield as orange microcrystals. 31P{1H} NMR analysis (CDCl3, 81.01 MHz, 294 K) showed the compound to be a 1:1 mixture of (*R*)C-(*S*)Fe-(*R*)P and (*R*)C-(*S*)Fe-(*S*)P diastereomers (see Table 1). Anal. Calcd for C44H47FeB2OP3: C, 69.33; H, 6.21. Found: C, 69.38; H, 6.24.

**Resolution of the Two P3ChirO·2(BH3) Diastereomers.** Column flash chromatography of the above diastereomeric 1:1 mixture **2** allowed the separation of the two P3ChirO·2(BH3) diastereomers (silica, gradient eluition AcOEt : *n*-pentane = 35 : 65; 42 : 58; 50 : 50; 100 % AcOEt v/v). Each isomer was isolated in the solid state in ca. 75 % yield and > 99 % purity, as shown by TLC, 31P{1H} and 1H NMR spectroscopy. The first diastereomer (*Rf* 0.37, silica, acetone : *n*-pentane = 1 : 2.4) was recrystallized from CH2Cl2/CH3OH to give well-shaped single crystals which were authenticated as the (*R*)C-(*S*)Fe-(*R*)P isomer by X-ray diffraction analysis (see below). The second diastereomer ((*R*)C-(*S*)Fe-(*S*)P, *Rf* 0.27) was not purified futher. 1H NMR (CDCl3, 200.13 MHz, 294 K) (*R*)C-(*S*)Fe-(*R*)P - **2** diastereomer:  5.08 (*bs*, 1H, C5H3), 4.47 (*t*, 1H, C5H3,*J* = 2.5 Hz), 4.27 (*s*, 5H, C5H5), 4.06 (*bs*, 1H, C5H3), 3.62 (*qd*, 1H, C*H*CH3, 3*J*HH = 7.7, 2*J*HP = 3.7 Hz), 2.48 (*m*, 2H, PCH2), 2.28 (*s*, 6H, BH3), 1.66 (*dd*, 3H, CHC*H*3,3*J*HH = 7.7, 3*J*HP = 16.8 Hz), 1.59 (*m*, 2H, PCH2). 25D = 59.9. 1H NMR (CDCl3, 200.13 MHz, 294 K) (*R*)C-(*S*)Fe-(*S*)P - **2** diastereomer:  4.87 (*bs*, 1H, C5H3), 4.50 (*t*, 1H, C5H3,*J* = 2.4 Hz), 4.15 (*bs*, 1H, C5H3), 4.04 (*s*, 5H, C5H5), 4.00 (*qd*, 1H, C*H*CH3, 3*J*HH = 7.5, 2*J*HP = 3.7 Hz), 2.60 (*m*, 2H, PCH2), 2.27 (*s*, 6H, BH3), 2.07 (*m*, 2H, PCH2), 1.85 (*dd*, 3H, CHC*H*3,3*J*HH = 7.5, 3*J*HP = 15.4 Hz). 25D = 127.8.

**(*R*)C-(*S*)Fe-(*S*)P-P3Chir (3).** A suspension of CeCl3 (0.90 g, 3.64 mmol) in THF (25 mL) was stirred at r.t. for 15 min. After that time, solid NaBH4 (0.14 g, 3.64 mmol) was added an the mixture stirred for further 1h. Solid (*R*)C-(*S*)Fe-(*S*)P - **2** (0.56 g, 0.73 mmol) and LiAlH4 (0.04 g, 1.09 mmol) were then added in sequence in small portions and the suspension was stirred at r.t. overnight. Benzene (30 mL) was added and the mixute gently poured into 0.5 M aqueous HCl at 0 °C (150 mL). The organic phase was separated and the aqueous phase was washed with CH2Cl2 (30 mL). The extracts were collected together and dried over Na2SO4. After the solvent was removed in vacuo, the orange product obtained was dissolved in morpholine (20 mL) and heated with stirring at 70 °C for 2.5 h under nitrogen. The solvent was removed in vacuo and the resulting oil purified by flash chromatography (silica, AcOEt : *n*-pentane = 1 : 13) to give pure **3** as orange microcrystals in 80 % yield. Crystallization from methanol gave needles suitable from X-ray diffraction analysis, from which the compound was authenticated as the (*R*)C-(*S*)Fe-(*S*)P isomer (see below). 1H NMR (CDCl3, 400.13 MHz, 294 K):  7.65 (*m*, 2H, Ph), 7.50 - 7.10 (*m*, 23H, Ph), 4.30 (*t*, 1H, C5H3,3*J*HH = 2.3 Hz), 4.21 (*m*, 1H, C5H3), 4.05 (*m*, 1H, C5H3), 3.84 (*s*, 5H, C5H5), 3.31 (*qd*, 1H, C*H*CH3, 3*J*HH = 7.0, 2*J*HP = 3.5 Hz), 1.81 (*m*, 2H, PCH2), 1.75 (*m*, 1H, PC*H*H), 1.52 (*m*, 1H, PCH*H*), 1.24 (*t*, 3H, CHC*H*3,3*J*HH = 3*J*HP = 6.8 Hz). 13C{1H} NMR (CDCl3, 100.61 MHz, 294 K):  98.47 (*bs*, 1C, C5H3), 74.38 (*d*, 1C, C5H3,*J*CP = 6.8 Hz), 71.42 (*s*, 1C, C5H3), 69.49 (*s*, 5C, C5H5), 69.15 (*s*, 1C, C5H3), 68.60 (*s*, 1C, C5H3), 32.12 (*bs*, 1C, *C*HCH3), 24.25 (*d*, 1C, CH2,*J*CP = 15.5 Hz), 15.22 (*s*, 1C, CH*C*H3), 15.11 (*s*, 1C, CH2).25D = 300.0. F. p. 68.4 - 70.4 °C. Anal. Calcd for C44H41FeP3: C, 73.55; H, 5.75. Found: C, 73.52; H, 5.69.

**(*R*)C-(*S*)Fe-(*R*)P-P3Chir (4).** This compound was prepared as described above for **3** by using (*R*)C-(*S*)Fe-(*R*)P - **2** instead of (*R*)C-(*S*)Fe-(*S*)P - **2**. Yield 88 %. 1H NMR (CDCl3, 400.13 MHz, 294 K):  7.67 (*m*, 2H, Ph), 7.39 - 7.43 (*m*, 3H, Ph), 7.12 - 7.37 (*m*, 20H, Ph), 4.31 (*t*, 1H, C5H3,3*J*HH = 2.4 Hz), 4.12 (*m*, 1H, C5H3), 4.06 (*m*, 1H, C5H3), 3.87 (*s*, 5H, C5H5), 3.11 (*qd*, 1H, C*H*CH3, 3*J*HH = 7.1, 2*J*HP = 4.3 Hz), 1.93 (*m*, 1H, PC*H*H), 1.72 (*m*, 1H, PCH*H*), 1.54 - 1.44 (*m*, 2H, PCH2), 1.25 (*dd*, 3H, CHC*H*3,3*J*HH = 7.1, 3*J*HP = 9.8 Hz). 13C{1H} NMR (CDCl3, 100.61 MHz, 294 K):  95.52 (*bs*, 1C, C5H3), 74.37 (*d*, 1C, C5H3,*J*CP = 6.9 Hz), 70.65 (*s*, 1C, C5H3), 69.37 (*s*, 5C, C5H5), 69.03 (*s*, 1C, C5H3), 68.58 (*s*, 1C, C5H3), 30.03 (*d*, 1C, *C*HCH3, 1*J*CP = 11.3 Hz), 23.95 (*d*, 1C, CH2,*J*CP = 15.2 Hz), 20.44 (*d*, 1C, CH2,*J*CP = 15.8 Hz), 18.74 (*d*, 1C, CH*C*H3,2*J*CP = 8.7 Hz).25D = 199.7. F. p. 70.2 - 72.6 °C. Anal. Calcd for C44H41FeP3: C, 73.55; H, 5.75. Found: C, 73.49; H, 5.72.

**Synthesis of the Complexes. [((*R*)C-(*S*)Fe-(*S*)P-P3Chir)Ni(CH3CN)]BF4 (5).** Solid [Ni(CH3CN)6](BF4)2.0.5CH3CN (0.04 g, 0.09 mmol) was added to a solution of (*R*)C-(*S*)Fe-(*S*)P-P3Chir (**3**) (0.06 g, 0.09 mmol) in CH3CN (2.5 mL) and the mixture was stirred at room temperature for 15 min. Diethyl ether (10 mL) was slowly added to the violet solution obtained causing the precipitation of a violet solid. This was filtered off and recrystallized from acetonitrile-diethyl ether to give pure **5** in 87% yield. 1H NMR (CD2Cl2, 200.13 MHz, 294 K):  1.96 (*s*, 3H, CH3CN). 1H NMR (CD3CN, 400.13 MHz, 294 K):  8.66 (*m*, 2H, *o*-PhP(2)), 8.03 (*m*, 2H, *o*-Ph'P(1)), 7.48 - 7.87 (*m*, 17H, Ph), 7.39 (*m*, 2H, Ph), 7.24 (*m*, 2H, *o*-Ph"P(1)), 4.77 (*q*, 1H, C(4)H, 3*J*HH = 7.3, 4*J*HP = 2.7 Hz), 4.73 (*m*, 1H, C(3)H), 4.29 (*m*, 1H, C(5)H), 3.84 (*dq*, 1H, C*H*CH3, 3*J*HH = 7.3, 2*J*HP = 11.8 Hz), 3.30 (*s*, 5H, C5H5), 2.89 (*m*, 1H, C(13)*H*H), 2.75 (*m*, 1H, C(14)*H*H), 2.30 (*m*, 1H, C(13)H*H*), 1.78 (*m*, 1H, C(14)H*H*), 1.39 (*dd*, 3H, CHC*H*3,3*J*HH = 7.3, 3*J*HP = 17.5 Hz). 13C{1H} NMR (CD3CN, 100.61 MHz, 294 K):  95.00 (*d*, 1C, C(1),1*J*CP = 18.8 Hz), 72.92 (*s*, 1C, C(4)), 72.79 (*s*, 1C, C(3)), 71.27 (*s*, 1C, C(5)), 70.77 (*s*, 5C, C5H5), 29.26 (*d*, 1C, *C*HCH3, 1*J*CP = 32.0 Hz), 28.65 (*m*, 1C, C(13)), 23.12 (*s*, 1C, CH*C*H3), 21.20 (*d*, 1C, C(14),*J*CP = 30.6 Hz). Anal. Calcd for C46H44NBF4FeNiP3: C, 61.04; H, 4.90; N, 1.55. Found: C, 61.12; H, 4.84; N, 1.47. IR: 2349, 2322, 2303 (C-N) cm-1.

**[((*R*)C-(*S*)Fe-(*R*)P-P3Chir)Ni(CH3CN)]BF4 (6).** This compound was prepared as described above for **5** by using (*R*)C-(*S*)Fe-(*R*)P-P3Chir (**4**) instead of (*R*)C-(*S*)Fe-(*S*)P-P3Chir (**3**). Yield 92 %. 1H NMR (CD2Cl2, 200.13 MHz, 294 K):  2.03 (*s*, 3H, CH3CN). 1H NMR (CD3CN, 400.13 MHz, 294 K):  7.89 (*m*, 2H, *o*-Ph'P(1)), 7.76 (*m*, 1H, Ph), 7.59 - 7.72 (*m*, 10H, Ph), 7.38 - 7.54 (*m*, 3H, Ph), 7.31 - 7.40 (*m*, 3H, Ph), 6.97 - 7.04 (*m*, 6H, Ph), 4.94 (*bs*, 1H, C(5)H), 4.62 (*bt*, 1H, C(4)H), 4.44 (*bs*, 1H, C(3)H), 4.37 (*dq*, 1H, C*H*CH3, 3*J*HH = 7.3, 2*J*HP = 12.1 Hz), 3.89 (*s*, 5H, C5H5), 3.17 (*m*, 1H, C(14)*H*H,*J*HP = 43.6 Hz), 2.87 (*m*, 1H, C(13)*H*H), 2.76 (*m*, 1H, C(13)H*H*,*J*HP = 55.0 Hz), 2.15 (*m*, 1H, C(14)H*H*), 1.89 (*dd*, 3H, CHC*H*3,3*J*HH = 7.3, 3*J*HP = 15.4 Hz). 13C{1H} NMR (CD3CN, 100.61 MHz, 294 K):  91.29 (*d*, 1C, C(1),1*J*CP = 19.5 Hz), 83.22 (*s*, 1C, C(2)), 74.33 (*s*, 1C, C(3)), 71.89 (*s*, 1C, C(4)), 71.87 (*s*, 1C, C(5)), 71.62 (*s*, 5C, C5H5), 32.56 (*d*, 1C, *C*HCH3, 1*J*CP = 23.2 Hz), 31.18 (*d*, 1C, C(14),*J*CP = 52.0 Hz), 25.26 (*d*, 1C, C(13),*J*CP = 34.2 Hz), 13.24 (*d*, 1C, CH*C*H3,2*J*CP = 7.8 Hz). Anal. Calcd for C46H44NBF4FeNiP3: C, 61.04; H, 4.90; N, 1.55. Found: C, 61.08; H, 4.85; N, 1.49. IR: 2360, 2324, 2292 (C-N) cm-1.

**X-ray Crystal Structure Determination of (*R*)C-(*S*)Fe-(*R*)P-P3ChirO·2(BH3) ((*R*)C-(*S*)Fe-(*R*)P-2).6** Single crystals of (*R*)C-(*S*)Fe-(*R*)P-**2** were obtained by recrystallization from CH2Cl2/CH3OH. X-ray data were recorded on an Enraf - Nonius CAD4 diffractometer. Chemical formula C44H47FeB2OP3, M = 762.2, crystal dimensions 0.55 x 0.35 x 0.1 mm, orthorhombic, *P*212121 (no. 19), *a* = 11.436(15), *b* = 31.504(5), *c* = 11.270(3) Å, volume = 4060(5) Å3, *Z* = 4, calcd = 1.247 Mg/m3, 2max = 22.96, radiation = Mo K, wavelength = 0.71073 Å, *T* = 293(2) K, measured reflections = 3202, independent reflections = 3202, data corrected for Lorentz and polarization effects, absorption coefficient = 0.522 mm-1, absorption correction type = psi-scan, correction factors = 0.884 - 0.929. The structure was solved by direct methods using the SIR97 program.7 The computational work was carried out using the program SHELX97.8 Refinement was done by full-matrix least-squares calculations on F2, initially with isotropic thermal parameters then with anisotropic thermal parameters for the Fe, P and C atoms of the ferrocene rings. All the hydrogens atoms were introduced at calculated positions. The phenyl rings were treated as rigid bodies with *D6h*symmetry. No. of parameters = 405, *R* indices (all data) *R* = 0.1055 and *wR* = 0.1368. The absolute configuration was confirmed by the refinement of the Flack parameter = -0.04(6).

**X-ray Crystal Structure Determination of (*R*)C-(*S*)Fe-(*S*)P-P3Chir (3).9** Single crystals of **3** were obtained by recrystallization from CH3OH. X-ray data were recorded on an Enraf - Nonius CAD4 diffractometer. Chemical formula C44H41FeP3, M = 718.53, crystal dimensions 0.43 x 0.13 x 0.13 mm, orthorhombic, *P*212121 (no. 19), *a* = 12.117(2), *b* = 15.381(9), *c* = 19.922(5) Å, volume = 3713(2) Å3, *Z* = 4, calcd = 1.285 Mg/m3, 2max = 22.46, radiation = Mo K, wavelength = 0.71073 Å, *T* = 293(2) K, measured reflections = 2729, independent reflections = 2729, data corrected for Lorentz and polarization effects, absorption coefficient = 0.566 mm-1, absorption correction type = psi-scan, correction factors = 0.7950 - 0.9326. The structure was solved by direct methods using the SIR97 program.7 The computational work was carried out using the program SHELX97.8 Refinement was done by full-matrix least-squares calculations on F2, initially with isotropic thermal parameters then with anisotropic thermal parameters for all atoms. All the hydrogens atoms were introduced at calculated positions. The phenyl rings were treated as rigid bodies with *D6h*symmetry. No. of parameters = 376, *R* indices (all data) *R* = 0.1179 and *wR* = 0.1423. The absolute configuration was confirmed by the refinement of the Flack parameter = 0.04(6).

**References**

§ Abbreviations: (*R*)C-(*S*)Fe-(*S*)P-P3Chir = (R)-1-[(S)-2-diphenylphosphino)ferrocenyl]-ethyl-(S)-[phenylphosphin-2-(diphenylphosphino)ethane]

1. Hayashi, T.; Mise, T.; Fukushima, M.; Kagotani, M.; Nagashima, N.; Hamada, Y.; Matsumoto, A.; Kawakami, S.; Konishi, M.; Yamamoto, K.; Kumada, M. *Bull. Chem. Soc. Jpn.* **1980**, *53*, 1138
2. K. D. Berlin; G. B. Butler *J. Am. Chem. Soc.* **1961**, *26*, 2537.
3. Hathaway, B. J.; Holah, D. G.; Underhill, A. E. *J. Chem. Soc.* **1962**, 2444.
4. King, R. B.; Cloyd, J. C., Jr. *J. Am. Chem. Soc.* **1975**, *97*, 46.
5. (a) James, B. R.; Ochiai, E.; Rempel, G. I. *Inorg. Nucl. Chem. Lett.* **1971**, *7*, 701. (b) Summers, M. F.; Marzilli, L. G.; Bax, A. *J. Am. Chem. Soc.* **1986**, *108*, 4285.
6. CCDC 184405 contains the supplementary crystallographic data for this paper. These data can be obtained free of charge via www.ccdc.cam.ac.uk/conts/retrieving.html (or from the CCDC, 12 Union Road, Cambridge CB2 1EZ, UK; fax: +44 1223 336033; e-mail: deposit@ccdc.cam.ac.uk).
7. Altomare, A.; Burla, M. C.; Camalli , M.; Cascarano, G.; Giacovazzo, C.; Guagliardi, A.; Polidori, G.; Spagna, R. *J.* *Appl.* *Cryst.* **1999**, *32*, 115.
8. Sheldrick, G. M. *SHELX-97.* *Program* *for* *Structure* *Refinement.* University of Göttingen, Germany, release 97 - 2, **1997**.
9. CCDC 184406 contains the supplementary crystallographic data for this paper. These data can be obtained free of charge via www.ccdc.cam.ac.uk/conts/retrieving.html (or from the CCDC, 12 Union Road, Cambridge CB2 1EZ, UK; fax: +44 1223 336033; e-mail: deposit@ccdc.cam.ac.uk).
